# Supplementary material for: Molecular Pathogenesis of Gene Regulation by the miR-150 Duplex: miR-150-3p Regulates TNS4 in Lung Adenocarcinoma
Source: PubMed Central journal article supplement (PMC6562801; doi:10.3390/cancers11050601), 2019-04-30
Supplement: cancers-11-00601-s001.pdf [file cancers-11-00601-s001.pdf]

## Supplementary Materials: Molecular pathogenesis of gene regulation by the *miR-150* duplex: *miR-150-3p* regulates *TNS4* in lung adenocarcinoma

Shunsuke Misono, Naohiko Seki, Keiko Mizuno, Yasutaka Yamada, Akifumi Uchida, Hiroki Sanada, Shogo Moriya, Naoko Kikkawa, Tomohiro Kumamoto, Takayuki Suetsugu and Hiromasa Inoue

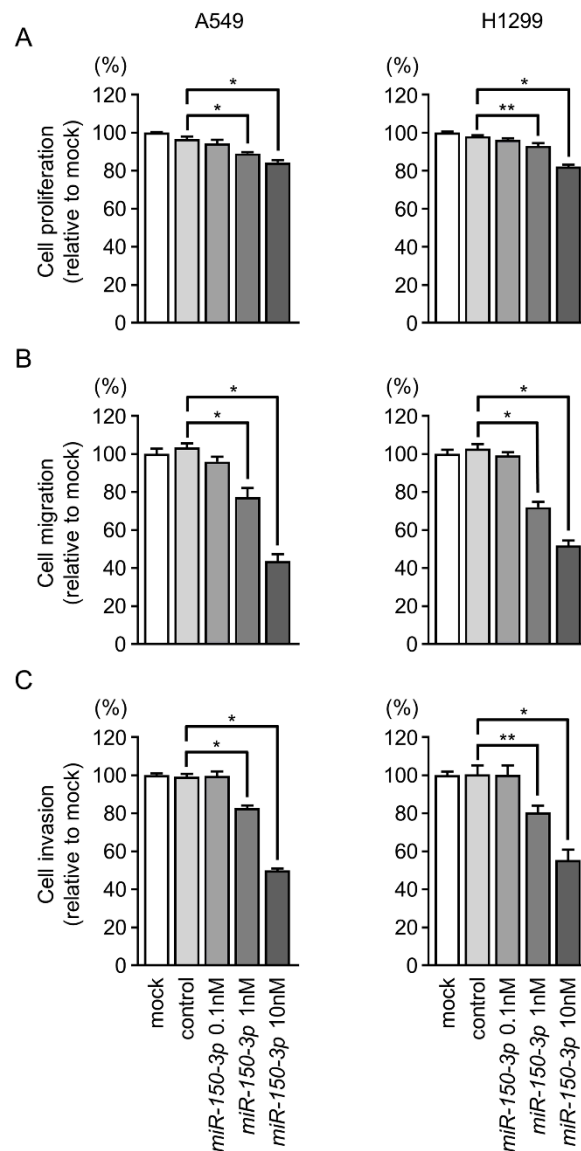

**Figure S1.** Functional assays of *miR-150-3p* (0.1 nM, 1 nM, 10 nM) in LUAD cells (A549 and H1299). (A-C) Cell proliferation, migration, and invasive activities were significantly blocked by ectopic expression of *miR-150-3p* with 1 nM and 10 nM concentration. \*  $p < 0.01$ , \*\*  $p < 0.05$ .

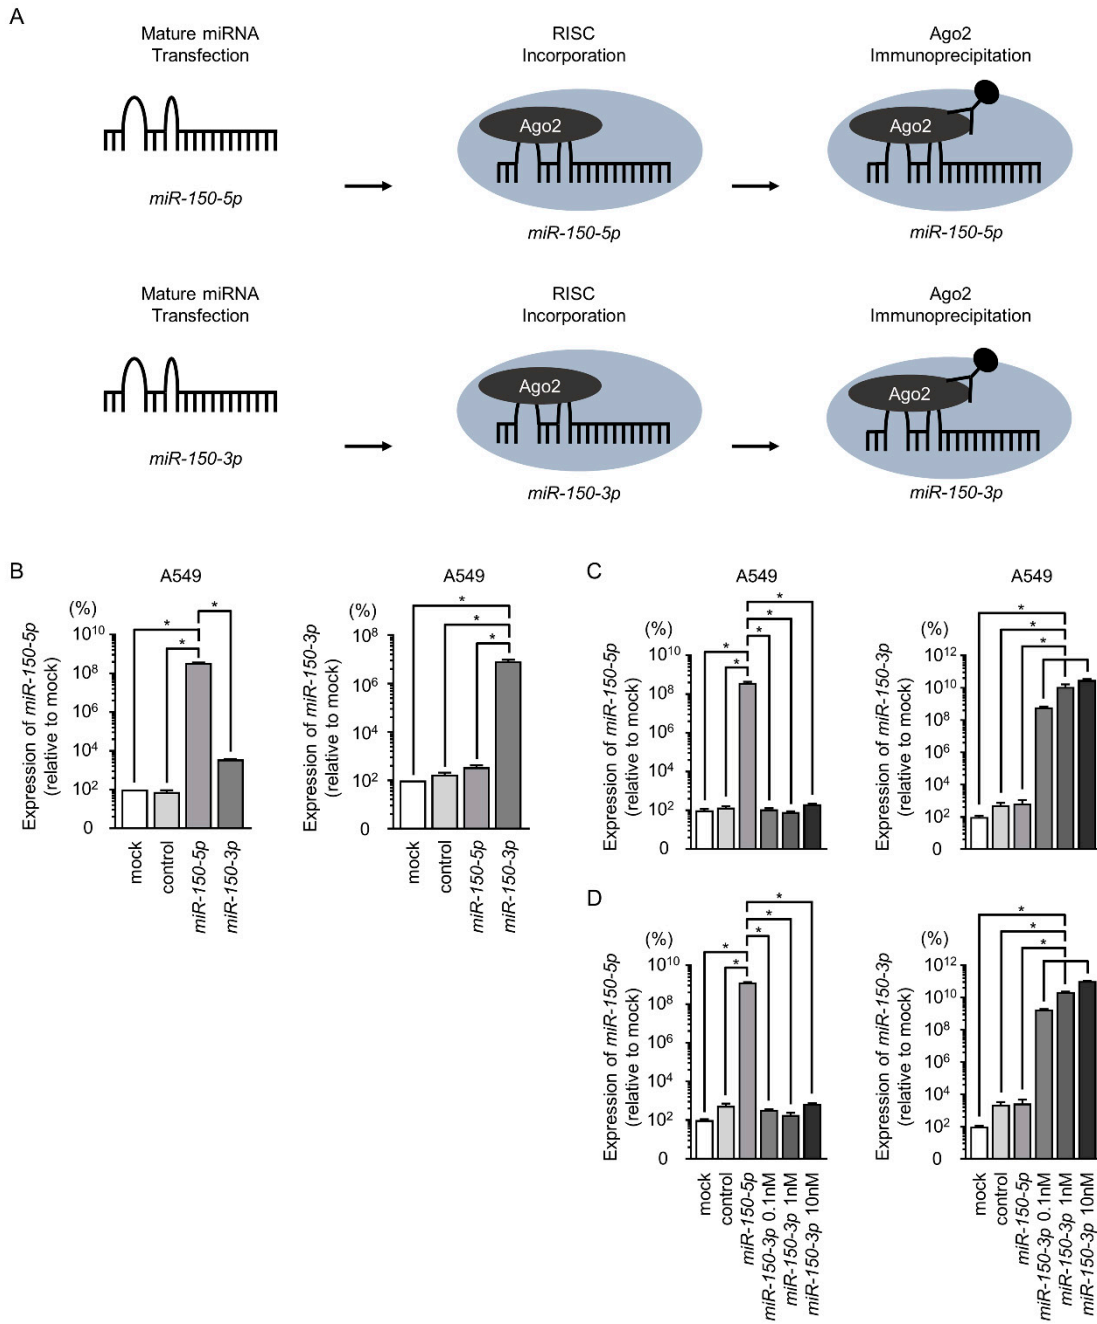

**Figure S2.** Both strands of *miR-150-5p* and *miR-150-3p* were incorporated into the RISC. (A) Schematic diagram for isolation of the Ago2-miRNA complex from the RISC. (B–D) Expression levels of *miR-150-5p* or *miR-150-3p* bound to Ago2 were measured by TaqMan RT-qPCR and normalized to the expression of *miR-26a* (B), *miR-16-5p* (C) and *miR-21-5p* (D), which had no effect upon *miR-150-5p* and *miR-150-3p*. \*  $p < 0.01$ .

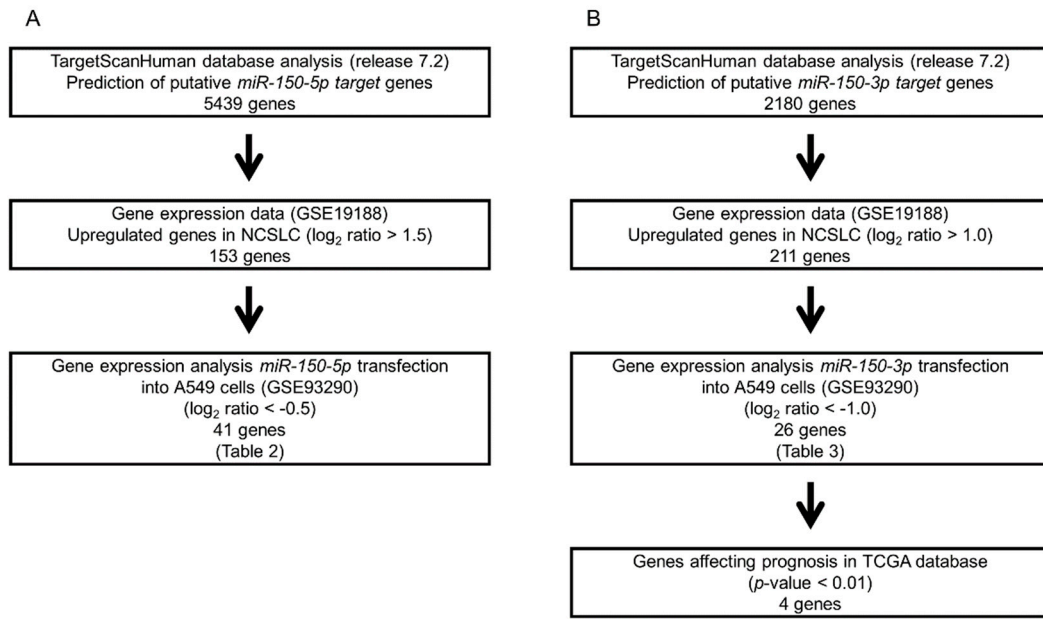

**Figure S3.** The strategy for identification of genes regulated by *miR-150-5p* and *miR-150-3p*. We obtained putative genes regulated by *miR-150-5p* and *miR-150-3p* using the TargetScanHuman Release 7.2 database and selected upregulated genes in non-small cell lung cancer clinical expression profiles from the GEO database (GSE19188). Then, we combined the gene expression analyses using A549 cells transfected with *miR-150-5p* or *miR-150-3p* and inspected the downregulated genes (GSE93290).

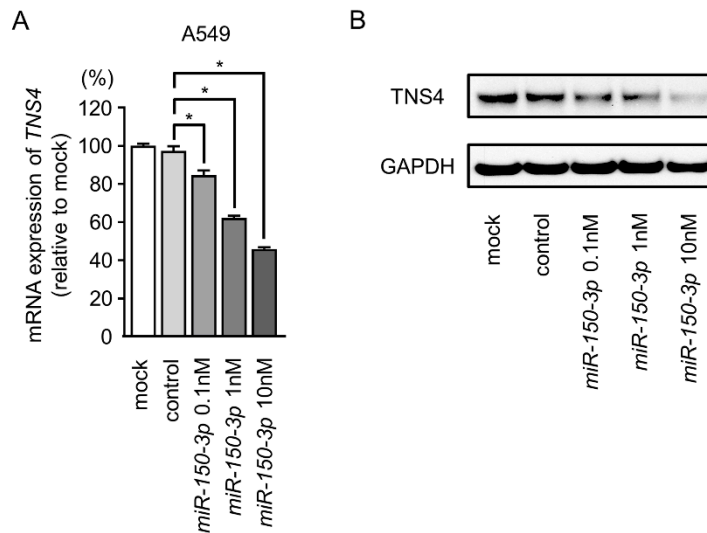

**Figure S4.** *TNS4* was directly suppressed at the diluted concentration of *miR-150-3p* precursor (1 nM and 0.1 nM). (A,B) *TNS4* mRNA and protein expression was reduced by *miR-150-3p* ectopic expression (48h after transfection). *GUSB* was used as an expression control. GAPDH was used as a loading control. \*  $p < 0.01$ .

*TNS4* 3'UTR variant 1

GACAGAGCCTCAGGAGAACGTATGCCACCTCTTTGCGGAGTATGACATGGTCCAGCCAGC  
 CTCGCAGGTCATCGGCCTGGTGACTGCTCTGCTGCAGGACGCAGAAAGGATGTAGGGGAG  
 AAACCTGCCTGTGCACCTAACCAACACCTCCAGGGGCCCGCTAAGGAGCCCCCTCCACCC

CCTGAATGGGTGTGGCTTGTGGCCATATTGACAGACCAATCTATGGGACTAGGGGGATTG  
 GCATCAAGTTGAAACCCCATCTCTACAAAGAATACAAAAATTAGCCGGGCAAGGTAGCGC  
 ACCTGTGGTCCCAGGTA CTCTCGGGAGACTGAGGCATGAGAATCCCTTGAAACTGGGAGGCG  
 GAAGTTGCAGTGAGCTGTGATCGTGCCACTGCACTCCAGCCTGGTTGACAGAGCAACATG  
 CTATCTCTAAAACAAACAAACAAACAAAACTCAGGTTCCACACCCTCTAAACCCTGCC  
 TCCTCTCAGGCTACAGAGACCTCTCCAGGAGGCTGAAGTGCCCTTACCCCGACCATCTGA  
 CCAGCCACCGCCCCATGCCCGTGCCCCACCGAGGGCGGAGGCTGCTCACTGCTCTGTTTT  
 ATCTCTGGCCTCTGATCCTGCATTCTTGTGCCAGGGCTTAGACCCAGGGCAAGGTCTTAG  
 ACCCAGGGCAGGGGTAGGGTTAAAGGCTTTCAACCCAGGGGCCAGTGCCTTAATTCATGC  
 AACAAATGTTTTCTGGCTGTGTGCTTTATTCATGTGAACCAGGAAAACAGAAAAATATGA  
 CAGTGTTCACACAGAGGTTTATAAGTGCTATGCAGGGCTGGTGAAAGAGTAGAAACTG  
 AGAAAGATAAACTTTACCCACTTGAAGGGAAGGAGGGCAATGTTACCAAGAAGGTAACAT  
 TTGAGTTGGTCTTCAAGGATGAATAGGAGTTCGGCATGCAAAGAGAGTTAGAAACCAAC  
 TTTTAGGAGTGGGAGGGGCTCTCATGTGCTACATACAATCTGAGGCACATTATATATGC  
 CTAATCCCATTTTACAGATTAGAAAACCTGGGGCTCAGAGGGTTAACTTGCCACATTAC  
 CTAAGTGTAAATGGCAGAGAAACAGGATTTCAAGTCCATGCCCATCTATTGCCCCAGCA  
 TTCACAGAAAGCAGATGGAGACATTCGTGTGTGAAGCACACAGGTATGAAAAGATGTACC  
 AAGTTTTGGTGTGGCTCAAGTACATGGTACCTAAGGGAGTAGGTGAGAGAGAAAGCAGAAG  
 TNS4 3'UTR variant 2

GACAGAGCCTCAGGAGAACGTATGCCACCTCTTTGCGGAGTATGACATGGTCCAGCCAGC  
 CTCGCAGGTCATCGGCCTGGTACTGCTCTGCTGCAGGACGCAGAAAGGATGTAGGGGAG  
 AGACTGCCTGTGCACCTAACCAACACCTCCAGGGGCTCGCTAAGGAGCCCCCTCCACCC  
 CCTGAATGGGTGTGGCTTGTGGCCATATTGACAGACCAATCTATGGGACTAGGGGGATTG  
 GCATCAAGTTGACACCCTTGAACCTGCTATGGCCTCAGCAGTCACCATCATCCAGACCC  
 CCCGGCCTCAGTTTCTCAATCATAGAAGAAGACCAATAGACAAGATCAGCTGTTCTTA  
 GATGCTGGTGGGCATTTGAACATGCTCCTCCATGATTCTGAAGCATGCACACCTCTGAAG  
 ACCCCTGCATGAAAATAACCTCCAAGGACCCTCTGACCCCATCGACCTGGGCCCTGCCCA  
 CACAACAGTCTGAGCAAGAGACCTGCAGCCCCGTTCGTGGCAGACAGCAGGTGCCTGG  
 CGGTGACCCACGGGGCTCCTGGCTTGACGCTGGTGTGTTCAAGAACTGACTACAAAACA  
 GGAATGGATAGACTCTATTTCTTCCATATCTGTTCTCTGTTCCTTTTCCCACTTTCTG  
 GGTGGCTTTTTGGGTCCACCCAGCCAGGATGCTGCAGGCCAAGCTGGGTGTGGTATTTAG  
 GGCAGCTCAGCAGGGGGA ACTTGTCCCCATGGTCAGAGGAGACCCAGCTGTCTCTGCACCC  
 CTTTGCAGATGAGTATCACCCATCTTTTCTTCCACTTGTTTTTTATTTTTATTTTTT  
 TGAGACAGAGTCTCACTGTCAACCAGGCTGAACTGCAGTGGTGTGATCTAGGCTCACTGC  
 AACCTCCACCTCCCAGGTA CTCTCAGGAGACTGAGGCATGAGAATCCCTTGAAACTGGGAGG  
 CGGAAGTTGCAGTGAGCTGTGATCGTGCCACTGCACTCCAGCCTGGTTGACAGAGCAACA  
 TGCTATCTCTAAAACAAACAAACAAACAAAACTCAGGTTCCACACCCTCTAAACCCTG  
 CCTCTCTCAGGCTACAGAGACCTCTCCAGGAGGCTGAAGTGCCCTTACCCCGACCATCT  
 GACCAGCCACCGCCCCATGCCCGTGCCCCACCGAGGGCGGAGGCTGCTCACTGCTCTGTT  
 TTATCTCTGGCCTCTGATCCTGCATTCTTGTGCCAGGGCTTAGACCCAGGGCAAGGTCTT  
 AGACCCAGGGCAGGGGTAGGGTTAAAGGCTTTCAACCCAGGGGCCAGTGCCTTAATTCAT  
 GCAACAAATGTTTTCTGGCTGTGTGCTTTATTCATGTGAACCAGGAAAACAGAAAAATAT

GACAGTGTTC AACAGAGGTTTATAAGTGCTATGCAGGGCTGGTGGAAAGAGTAGAAAC  
TGAGAAAGATAAACTTTACCCACTTGAAGGGAAGGAGGGCAATGTTACCAAGAAGGTAAC  
ATTTGAGTTGGGTCTTCAAGGATGAATAGGAGTTCGGCATGCAAAGAGAGTTAGAAACCA  
ACTTTTAGGAGTGGGGAGGGGCTCTCATGTGCTACATAACAATCTGAGGCACATTATATAT  
GCCTAATCCCATTTTACAGATTAGAAAAC TGGGGCTCAGAGGGTTAACTTGCCCACATTC  
ACCTAACTGTAAATGGCAGAGAAACAGGATTTCAAGTCCATGCCCATCCTATTGCCCCAG  
CATTACAGAAAGCAGATGGAGACATTCGTGTGTGAAGCACACAGGTATGAAAAGATGTA  
CCAAGTTTGGTGTGGCTCAAGTACATGGTACCTAAGGGAGTAGGTGAGAGAGAAAGCAGA  
TNS4 3'UTR variant 3

GACAGAGCCTCAGGAGAACGTATGCCACCTCTTTGCGGAGTATGACATGGTCCAGCCAGC  
CTCGCAGGTCATCGGCCTGGTACTGCTCTGCTGCAGGACGCAGAAAGGATGTAGGGGAG  
AGACTGCCTGTGCACCTAACCAACACCTCCAGGGGCTCGCTAAGGAGCCCCCTCCACCC  
CCTGAATGGGTGTGGCTTGTGGCCATATTGACAGACCAATCTATGGGACTAGGGGGATTG  
GCATCAAGTTGACACCCTTGAACCTGCTATGGCCTTCAGCAGTCACCATCATCCAGACCC  
CCCGGGCCTCAGTTTCTCAATCATAGAAGAAGACCAATAGACAAGATCAGCTGTTCTTA  
GATGCTGGTGGGCATTTGAACATGCTCCTCCATGATTCTGAAGCATGCACACCTCTGAAG  
ACCCCTGCATGAAAATAACCTCCAAGGACCCTCTGACCCCATCGACCTGGGGCCCTGCCCA  
CACAACAGTCTGAGCAAGAGACCTGCAGCCCCTGTTTCGTGGCAGACAGCAGGTGCCTGG  
CGGTGACCCACGGGGCTCCTGGCTTGACAGCTGGTGTGATGGTCAAGAAGTACTACAAAACA  
GGAATGGATAGACTCTATTTCTTCCATATCTGTTCTCTGTTCTTTTCCCACTTTCTG  
GGTGGCTTTTTGGGTCCACCCAGCCAGGATGCTGCAGGCCAAGCTGGGTGTGGTATTTAG  
GGCAGCTCAGCAGGGGAACTTGTCCCCATGGTCAGAGGAGACCAGCTGTCTGCACCC  
CCTTGCAGATGAGTATCACCCATCTTTCTTTCCACTTGTTTTTATTTTTATTTTTT  
TGAGACAGAGTCTCACTGTCACCCAGGCTGAACTGCAGTGGTGTGATCTAGGCTCACTGC  
AACCTCCACCTCCCAGGTTCAAGCAATTATCCTGCCTCAGGCTCCCAAGTAGCTGGGATT  
ACAGGCATGTGCAACTCACCCAGCTAATTTTGTATTTTATAGTAGAAACATGGTCAAACCC  
CATCTCTACAAAAAATACAAAAATTAGCCGGGCAAGGTAGCGCACCTGTGGTCCCAGGTA  
CTCAGGAGACTGAGGCATGAGAATCCCTTGAAACTGGGAGGCGGAAGTTGCAGTGAGCTG  
TGATCGTGCCACTGCACTCCAGCCTGGTTGACAGAGCAACATGCTATCTCTAAAACAAAC  
AAACAAACAAAAACTCAGGTTCCACACCCTCTAAACCCTGCCTCCTCTCAGGCTACAGA  
GACCTCTCCAGGAGGCTGAAGTGCCCTTACCCGACCATCTGACCAGCCACCGCCCCATG  
CCCGTGCCCCACCGAGGGCGGAGGCTGCTCACTGCTCTGTTTTATCTCTGGCCTCTGATC  
CTGCATTCTTGTGCCAGGGCTTAGACCCAGGGCAAGGTCTTAGACCCAGGGCAGGGGTAG  
GGTTAAAGGCTTTCAACCCAGGGGCCAGTGCCTTAATTCATGCAACAAATGTTTTCTGGC  
TGTGTGCTTTATTCATGTGAACCAGGAAAACAGAAAAATATGACAGTGTTC AACAGAG  
GTTTATAAGTGCTATGCAGGGCTGGTGGAAAGAGTAGAAACTGAGAAAGATAAACTTTAC  
CCACTTGAAGGGAAGGAGGGCAATGTTACCAAGAAGGTAACATTTGAGTTGGGTCTTCAA  
GGATGAATAGGAGTTCGGCATGCAAAGAGAGTTAGAAACCAACTTTTAGGAGTGGGGAGG  
GGCTCTCATGTGCTACATAACAATCTGAGGCACATTATATATGCCTAATCCCATTTTACAG  
ATTAGAAAAC TGGGGCTCAGAGGGTTAACTTGCCCACATTCACCTAACTGTAAATGGCAG  
AGAAACAGGATTTCAAGTCCATGCCCATCCTATTGCCCCAGCATTACAGAAAGCAGATG  
GAGACATTCGTGTGTGAAGCACACAGGTATGAAAAGATGTACCAAGTTTGGTGTGGCTCA

AGTACATGGTACCTAAGGGAGTAGGTGAGAGAGAAAGCAGAAGAAAAAGACAGCAACAGG

**Figure S5.** The nucleotide sequences of 3'UTR of *TNS4* in A549 cells. Several variants of the 3'UTR of *TNS4* existed in A549 cells. The putative binding site of *miR-150-3p* was found in 3'UTR of *TNS4*, respectively (highlighted in blue). Red font was stop codon. There was no binding site of *miR-150-5p* in 3'UTR of *TNS4*.

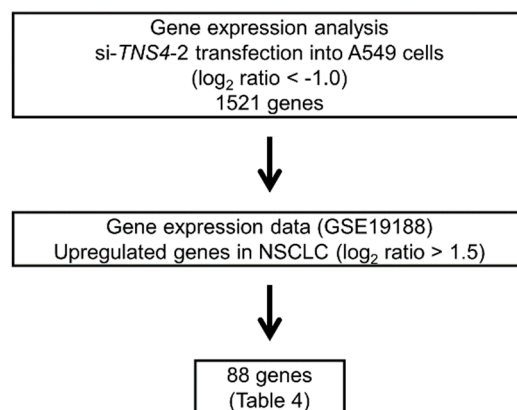

**Figure S6.** The strategy for identification of *TNS4*-modulated genes. We combined the gene expression analyses using A549 cells transfected with si-*TNS4* and GEO database (GSE19188). Finally, a total of 88 genes were identified as *TNS4*-modulated genes.

**Table S1.** Reagents used in this study.

| Antibody                     | Dilution      | Catalog Number | Company                                  |
|------------------------------|---------------|----------------|------------------------------------------|
| TNS4                         | IHC 1:50      | ab82178        | Abcam, Cambridge, UK                     |
|                              | WB 1:500      |                |                                          |
| GAPDH                        | WB 1:20000    | MAB374         | EMD Millipore, Billerica, MA, USA        |
| miRNA species                | Concentration | Assay ID       | Company                                  |
| <i>miR-150-5p</i>            | 10 nM         | PM 10070       | Applied Biosystems, Foster City, CA, USA |
| <i>miR-150-3p</i>            | 10 nM         | PM 12324       | Applied Biosystems, Foster City, CA, USA |
| negative control miRNA       | 10 nM         | AM 17111       | Applied Biosystems, Foster City, CA, USA |
| anti-miR Negative Control #1 | 10 nM         | AM 17010       | Applied Biosystems, Foster City, CA, USA |
| siRNA                        | Concentration | Catalog number | Company                                  |
| si- <i>TNS4</i>              | 10 nM         | HSS131536      | Invitrogen, Carlsbad, CA, USA            |
|                              |               | HSS131537      |                                          |
| Primer and probe             |               | Assay ID       | Company                                  |
| <i>miR-26a</i>               |               | 000405         | Applied Biosystems, Foster City, CA, USA |
| <i>miR-150-5p</i>            |               | 000473         | Applied Biosystems, Foster City, CA, USA |
| <i>miR-150-3p</i>            |               | 002637         | Applied Biosystems, Foster City, CA, USA |
| <i>RNU48</i>                 |               | 001006         | Applied Biosystems, Foster City, CA, USA |
| <i>TNS4</i>                  |               | Hs00262662_m1  | Applied Biosystems, Foster City, CA, USA |
| <i>GUSB</i>                  |               | Hs00939627_m1  | Applied Biosystems, Foster City, CA, USA |
| Plasmid vector               |               | Catalog number | Company                                  |

TNS4

RC222349

OriGene Technologies Inc., Rockville, MD, USA

**Table S2.** Immunohistochemical status and characteristics of the lung cancer and non-cancerous cases.

| <b>A. Immunohistochemical status and characteristics of LUAD cases</b> |       |   |   |   |                               |                               |                               |
|------------------------------------------------------------------------|-------|---|---|---|-------------------------------|-------------------------------|-------------------------------|
| Patient no.                                                            | Grade | T | N | M | Pathological stage            | Immunohistochemical intensity | Immunohistochemical extensity |
| 21                                                                     | 1     | 1 | 0 | 0 | IA                            | 3                             | 3                             |
| 22                                                                     | 1     | 2 | 1 | 0 | IIA                           | 3                             | 3                             |
| 23                                                                     | 2     | 1 | 0 | 0 | I                             | 3                             | 3                             |
| 24                                                                     | 2     | 2 | 2 | 0 | IIIA                          | 2                             | 3                             |
| 25                                                                     | 2     | 3 | 1 | 0 | IIIA                          | 3                             | 3                             |
| 26                                                                     | 2     | 2 | 0 | 0 | IB                            | 3                             | 3                             |
| 27                                                                     | 2     | 3 | 2 | 0 | IIIA                          | 3                             | 3                             |
| 28                                                                     | 2     | 1 | 0 | 0 | IA                            | 2                             | 3                             |
| 29                                                                     | 2     | 3 | 1 | 0 | IIIA                          | 1                             | 3                             |
| 30                                                                     | -     | 4 | 0 | 0 | IIIA                          | 3                             | 3                             |
| 31                                                                     | 2     | 2 | 0 | 0 | IIA                           | 1                             | 3                             |
| 32                                                                     | 2     | 3 | 1 | 0 | IIIA                          | 2                             | 3                             |
| 33                                                                     | 2     | 2 | 1 | 0 | IIB                           | 1                             | 3                             |
| 34                                                                     | 2     | 3 | 0 | 0 | IIB                           | 0                             | 0                             |
| 35                                                                     | 2     | 3 | 1 | 0 | IIIA                          | 2                             | 3                             |
| 36                                                                     | 3     | 2 | 1 | 0 | IIB                           | 3                             | 3                             |
| 37                                                                     | 3     | 2 | 0 | 0 | IB                            | 1                             | 3                             |
| 38                                                                     | 2     | 2 | 0 | 0 | IB                            | 1                             | 3                             |
| 39                                                                     | -     | 2 | 0 | 0 | IB                            | 3                             | 3                             |
| 40                                                                     | 2     | 2 | 1 | 0 | IIB                           | 1                             | 3                             |
| <b>B. Immunohistochemical status of non-cancerous cases</b>            |       |   |   |   |                               |                               |                               |
| patient no.                                                            |       |   |   |   | Immunohistochemical intensity | Immunohistochemical extensity |                               |
| 87                                                                     |       |   |   |   | 0                             | 0                             |                               |
| 88                                                                     |       |   |   |   | 1                             | 2                             |                               |
| 89                                                                     |       |   |   |   | 1                             | 3                             |                               |
| 90                                                                     |       |   |   |   | 1                             | 3                             |                               |
| 91                                                                     |       |   |   |   | 1                             | 2                             |                               |
| 92                                                                     |       |   |   |   | 1                             | 3                             |                               |
| 93                                                                     |       |   |   |   | 1                             | 2                             |                               |
| 94                                                                     |       |   |   |   | 1                             | 1                             |                               |
| 95                                                                     |       |   |   |   | 1                             | 3                             |                               |
| 96                                                                     |       |   |   |   | 2                             | 3                             |                               |
| 97                                                                     |       |   |   |   | 1                             | 2                             |                               |

|     |   |   |
|-----|---|---|
| 98  | 1 | 3 |
| 99  | 2 | 3 |
| 100 | 2 | 2 |

---

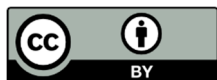

© 2019 by the authors. Submitted for possible open access publication under the terms and conditions of the Creative Commons Attribution (CC BY) license (<http://creativecommons.org/licenses/by/4.0/>).
